# Supplementary material for: Molecular tectonics: design of enantiomerically pure helical tubular crystals with controlled channel size and orientation
Source: Royal Society of Chemistry journal article supplement (doi:10.1039/c1cc12110c), 2011-01-01
Supplement: c1cc12110c.pdf [file c1cc12110c.pdf]

# Molecular tectonics: design of enantiomerically pure helical tubular crystals with controlled channel size and orientation

Mei-Jin Lin, Abdelaziz Jouaiti\*, Philippe Grosshans, Nathalie Kyritsakas and Mir Wais Hosseini\*

## Synthesis of compounds 1-4:

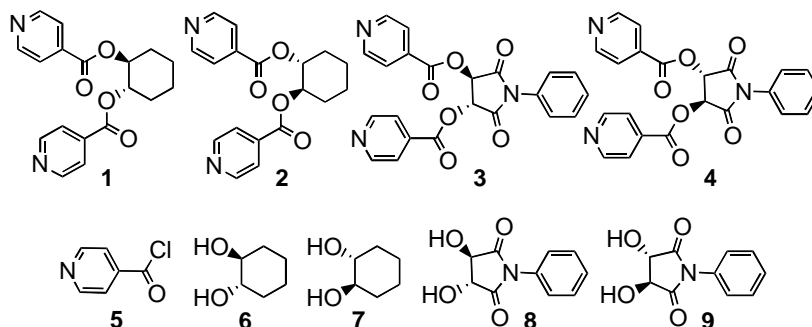

### General method for the syntheses of compounds 1 and 2:

Under nitrogen and at room temperature, to a degassed solution of alcohol **6** or **7** (5 mmol) in dry THF (20 ml), the hydrochloride salt of *isonicotinoyl chloride* **5** (15 mmol) was added and the mixture was stirred at room temperature for 15 min. Et<sub>3</sub>N (5 ml) was added to the mixture and stirring was further continued for two days. After evaporation to dryness, saturated aqueous solution of Na<sub>2</sub>CO<sub>3</sub> (40 ml) was added to the residue and the mixture extracted with CHCl<sub>3</sub> (3 x 30 ml). The organic solvent was removed and the residue purified by column chromatography [SiO<sub>2</sub>, CHCl<sub>3</sub>] affording the pure products as a colorless powder.

**Compound 1** (51% yield) Mp = 110 °C. <sup>1</sup>H-RMN (25 °C, 300 MHz, CDCl<sub>3</sub>): δ (ppm) 1.45 (m, 2H); 1.63 (m, 2H); 1.86 (m, 2H); 2.23 (m, 2H); 5.24 (m, 2H); 7.73 (dd, 4H, J = 1.6 Hz and 4.4 Hz); 8.71 (dd, 4H, J = 1.6 Hz and 4.4 Hz); <sup>13</sup>C-RMN (25 °C, 75 MHz, CDCl<sub>3</sub>): δ (ppm) 23.4; 30.1; 75.2; 122.7; 137.1; 150.6; 164.5. Mw = 326.35. % Calc. for C<sub>18</sub>H<sub>18</sub>N<sub>2</sub>O<sub>4</sub> C = 66.25; H = 5.56; N = 8.58, % Found C = 66.31; H = 5.72; N = 8.84.

**Compound 2:** (60% yield) Mp = 125 °C. <sup>1</sup>H-RMN (25 °C, 300 MHz, CDCl<sub>3</sub>): δ (ppm) 1.45 (m, 2H); 1.62 (m, 2H); 1.82 (m, 2H); 2.21 (m, 2H); 5.23 (m, 2H); 7.71 (dd, 4H, J = 1.6 Hz and 4.4 Hz); 8.66 (dd, 4H, J = 1.6 Hz and 4.4 Hz); <sup>13</sup>C-RMN (25 °C, 75 MHz, CDCl<sub>3</sub>): δ (ppm) 23.4, 30.1; 75.1; 122.7, 137.0, 150.6, 164.4. Mw = 326.35. % Calc. for C<sub>18</sub>H<sub>18</sub>N<sub>2</sub>O<sub>4</sub> C = 66.25; H = 5.56; N = 8.58, % Found C = 66.70; H = 5.73; N = 8.46.

### General method for the syntheses of compounds 3 and 4:

In the dark and under nitrogen, to a degassed solution of alcohol **8**<sup>1</sup> or **9**<sup>1</sup> (5 mmol) in dry THF (20 ml), the hydrochloride salt of *isonicotinoyl chloride* **5** (12.5 mmol) was added and the mixture was stirred at room temperature for 15 min. Pyridine (3 ml) was added to the mixture and stirring was further continued for 24h. After evaporation to dryness, saturated aqueous solution of Na<sub>2</sub>CO<sub>3</sub> (40 ml) was added to the residue and the mixture extracted with

CH<sub>2</sub>Cl<sub>2</sub> (2 x 30 ml). The organic solvent was removed and the residue purified by column chromatography [SiO<sub>2</sub>, CH<sub>2</sub>Cl<sub>2</sub>/MeOH 2%] affording the pure products as a colorless powder.

**Compound 3** (42% yield) Mp > 200 °C. <sup>1</sup>H-RMN (25 °C, 300 MHz, CDCl<sub>3</sub>): δ (ppm) 8.85-8.87 (d, 4H, J = 6.0), 7.91-7.93 (dd, 4H, J = 2.7 Hz and 1.8 Hz); 7.26-7.55 (m, 5H), 6.08 (s, 2H); <sup>13</sup>C-RMN (25 °C, 75 MHz, CDCl<sub>3</sub>): δ (ppm) 73.7; 123.1; 126.1; 129.5; 135.1; 150.9; 164.4; 167.5. Mw = 417.38. % Calc. for C<sub>22</sub>H<sub>15</sub>N<sub>3</sub>O<sub>6</sub> C 63.31, H 3.62, N 10.07; % Found C 63.16, H 3.77, N 10.33.

**Compound 4** (40% yield) Mp > 200 °C. <sup>1</sup>H-RMN (25 °C, 300 MHz, CDCl<sub>3</sub>): δ (ppm) 8.85-8.87 (d, 4H, J = 6.0 Hz); 7.78-7.91 (dd, 4H, J = 3.0 Hz and 1.2 Hz); 7.41-7.54 (m, 5H), 6.08 (s, 2H); <sup>13</sup>C-RMN (25 °C, 75 MHz, CDCl<sub>3</sub>): δ (ppm) 73.7; 123.1; 126.1; 129.5; 129.5; 135.2; 150.9; 164.4; 167.5. Mw = 417.38. % Calc. for C<sub>22</sub>H<sub>15</sub>N<sub>3</sub>O<sub>6</sub> C 63.31, H 3.62, N 10.07; % Found C 63.28, H 3.74, N 10.32.

---

1 A. M. d', A. Rocha Gonsalves, M. E. S. Serra, D. Murtinho, V. F. Silva, A. Matos Beja, J. A. Paixão, M. Ramos Silva, L. Alte da Veiga, *J. Mol. Catal. A: Chem.*, 2003, **195**, 1.

## Crystallography

Data (Tables TS1 and TS2) were collected on a Bruker SMART CCD diffractometer with Mo-Kα radiation. The structures were solved using SHELXS-97 and refined by full matrix least-squares on  $F^2$  using SHELXL-97 with anisotropic thermal parameters for all non hydrogen atoms.<sup>2</sup> The hydrogen atoms were introduced at calculated positions and not refined (riding model). In the case **1**·ZnSiF<sub>6</sub> and **2**·ZnSiF<sub>6</sub>, the SQUEEZE command was employed owing to the presence of highly disordered solvent molecules.<sup>3</sup>

CCDC 820939 - 820946 contain the supplementary crystallographic data for compounds **1**·ZnSiF<sub>6</sub> and **2**·ZnSiF<sub>6</sub>, **3**·ZnSiF<sub>6</sub> and **4**·ZnSiF<sub>6</sub>. These data can be obtained free of charge via [www.ccdc.cam.ac.uk/data\\_request/cif](http://www.ccdc.cam.ac.uk/data_request/cif).

**Crystallisation:** In a tube (0.5 cm diameter and 15 cm high), upon slow diffusion of an EtOH solution of ZnSiF<sub>6</sub> (5 mg) into a CHCl<sub>3</sub> solution (1 mL) of tectons **1-3** (3 mg), colourless crystalline material was obtained after *ca* 24-48 hours. In the case of tectons **4**, in a tube (0.5 cm diameter and 15 cm high), upon slow diffusion of an EtOH solution of ZnSiF<sub>6</sub> (5 mg) into a CH<sub>2</sub>ClCH<sub>2</sub>Cl solution (1 mL) of tecton **4** (3 mg) through a DMSO layer (0.1 ml), colourless crystalline material was obtained after *ca* 24-48 hours.

Both in the case of EtOH-CHCl<sub>3</sub> and EtOH-CH<sub>2</sub>ClCH<sub>2</sub>Cl mixtures, the crystallisation procedure in addition to the desired crystals produced an amorphous powder. In order to obtain the crystalline material, the mixture was manually sorted.

In the case of **1**·ZnSiF<sub>6</sub> and **2**·ZnSiF<sub>6</sub>, the solvent molecules (EtOH and CHCl<sub>3</sub>) were found to be disordered and the Squeeze command was used.

**Table TS1.** Crystallographic data (0.71073 Å, 173 K) for **X**·ZnSiF<sub>6</sub> (X = 1-3) obtained from a EtOH and CHCl<sub>3</sub> mixture.

| Formula                       | <b>1</b> ·ZnSiF <sub>6</sub>                                                                 | <b>2</b> ·ZnSiF <sub>6</sub>                                                                 | <b>3</b> ·ZnSiF <sub>6</sub>                                                                                                                   | <b>4</b> ·ZnSiF <sub>6</sub>                                                                                                                                                  |
|-------------------------------|----------------------------------------------------------------------------------------------|----------------------------------------------------------------------------------------------|------------------------------------------------------------------------------------------------------------------------------------------------|-------------------------------------------------------------------------------------------------------------------------------------------------------------------------------|
| Chemical formula              | C <sub>36</sub> H <sub>36</sub> F <sub>6</sub> N <sub>4</sub> O <sub>8</sub> SiZn<br>SQUEEZE | C <sub>36</sub> H <sub>36</sub> F <sub>6</sub> N <sub>4</sub> O <sub>8</sub> SiZn<br>SQUEEZE | 2(C <sub>44</sub> H <sub>30</sub> F <sub>6</sub> N <sub>6</sub> O <sub>12</sub> SiZn),<br>5(C <sub>2</sub> H <sub>6</sub> O), H <sub>2</sub> O | (C <sub>44</sub> H <sub>30</sub> F <sub>6</sub> N <sub>6</sub> O <sub>12</sub> SiZn),<br>2(C <sub>2</sub> H <sub>6</sub> O), (C <sub>2</sub> H <sub>4</sub> Cl <sub>2</sub> ) |
| Molecular weight              | 860.17                                                                                       | 860.15                                                                                       | 2332.76                                                                                                                                        | 1233.29                                                                                                                                                                       |
| Crystal system                | Orthorhombic                                                                                 | Orthorhombic                                                                                 | Monoclinic                                                                                                                                     | Monoclinic                                                                                                                                                                    |
| Space group                   | C222(1)                                                                                      | C2221                                                                                        | C2                                                                                                                                             | C2                                                                                                                                                                            |
| a(Å)                          | 7.6698(4)                                                                                    | 7.6731(5)                                                                                    | 24.0625(16)                                                                                                                                    | 23.2446(5)                                                                                                                                                                    |
| b(Å)                          | 21.0303(11)                                                                                  | 21.0006(13)                                                                                  | 7.6315(4)                                                                                                                                      | 7.5892(2)                                                                                                                                                                     |
| c(Å)                          | 28.3731(11)                                                                                  | 28.3703(19)                                                                                  | 16.3387(10)                                                                                                                                    | 16.6055(4)                                                                                                                                                                    |
| α(deg)                        | 90                                                                                           | 90                                                                                           | 90                                                                                                                                             | 90                                                                                                                                                                            |
| β(deg)                        | 90                                                                                           | 90                                                                                           | 99.928(3)                                                                                                                                      | 100.1650(10)                                                                                                                                                                  |
| γ(deg)                        | 90                                                                                           | 90                                                                                           | 90                                                                                                                                             | 90                                                                                                                                                                            |
| V(Å <sup>3</sup> )            | 4576.5(4)                                                                                    | 4571.6(5)                                                                                    | 2955.4(3)                                                                                                                                      | 2883.36(12)                                                                                                                                                                   |
| Z                             | 4                                                                                            | 4                                                                                            | 2                                                                                                                                              | 2                                                                                                                                                                             |
| Color                         | Colorless                                                                                    | Colorless                                                                                    | Colorless                                                                                                                                      | Colorless                                                                                                                                                                     |
| Crystal dim (mm)              | 0.08 x0.06x0.05                                                                              | 0.08x0.06x0.05                                                                               | 0.09x0.07x0.05                                                                                                                                 | 0.12x0.09x0.06                                                                                                                                                                |
| Dcalc (gcm <sup>-3</sup> )    | 1.248                                                                                        | 1.250                                                                                        | 1.310                                                                                                                                          | 1.421                                                                                                                                                                         |
| F(000)                        | 1768                                                                                         | 1768                                                                                         | 1200                                                                                                                                           | 1264                                                                                                                                                                          |
| μ (mm <sup>-1</sup> )         | 0.634                                                                                        | 0.635                                                                                        | 0.519                                                                                                                                          | 0.625                                                                                                                                                                         |
| Number of data meas.          | 23640                                                                                        | 14563                                                                                        | 24061                                                                                                                                          | 54470                                                                                                                                                                         |
| Number of data with I > 2σ(I) | 5232                                                                                         | 5241                                                                                         | 6428                                                                                                                                           | 6611                                                                                                                                                                          |
| R(int)                        | 0.048                                                                                        | 0.0345                                                                                       | 0.0304                                                                                                                                         | 0.0269                                                                                                                                                                        |
| R                             | 0.1025                                                                                       | 0.1145                                                                                       | 0.0542                                                                                                                                         | 0.03348                                                                                                                                                                       |
| Rw                            | 0.2626                                                                                       | 0.2374                                                                                       | 0.1541                                                                                                                                         | 0.0986                                                                                                                                                                        |
| R(all)                        | 0.1319                                                                                       | 0.1441                                                                                       | 0.0625                                                                                                                                         | 0.0351                                                                                                                                                                        |
| Flack parameter               | 0.002(3)                                                                                     | 0.03(1)                                                                                      | 0.023(2)                                                                                                                                       | 0.017(7)                                                                                                                                                                      |
| GOF                           | 1.212                                                                                        | 1.265                                                                                        | 1.028                                                                                                                                          | 1.002                                                                                                                                                                         |

**Crystallisation:** In a tube (0.5 cm diameter and 15 cm high), upon slow diffusion of an EtOH solution of  $\text{ZnSiF}_6$  (7 mg) into a  $\text{CH}_2\text{ClCH}_2\text{Cl}$  solution (1 mL) of tectons **1-4** (4 mg), colourless crystalline material was obtained after ca 24-48 hours. For all combinations of tectons **1-4** with  $\text{ZnSiF}_6$ , the procedure leads both to the desired crystals of  $\text{X}\cdot\text{ZnSiF}_6$  ( $X = 1-4$ ) and the parent  $\text{ZnSiF}_6$  salt. Owing to similar morphologies and colours between  $\text{X}\cdot\text{ZnSiF}_6$  ( $X = 1-4$ ) and  $\text{ZnSiF}_6$ , the identification could only be made by determining the unit cell for both crystals by X-ray diffraction. The procedure was repeated 4 times and statically, a 50/50 ratio was observed.

In the case of  $1\cdot\text{ZnSiF}_6$  and  $2\cdot\text{ZnSiF}_6$ , the solvent molecules ( $\text{EtOH}$  and  $\text{C}_2\text{H}_4\text{Cl}_2$ ) were found to be disordered and the Squeeze command was used.

**Table TS2.** Crystallographic Parameters (0.71073 Å, 173 K) for  $\text{X}\cdot\text{ZnSiF}_6$  ( $X = 1-4$ ) obtained from  $\text{EtOH}$  and  $\text{CH}_2\text{ClCH}_2\text{Cl}$  mixture.

| Formula                              | $1\cdot\text{ZnSiF}_6$                                                           | $2\cdot\text{ZnSiF}_6$                                                           | $3\cdot\text{ZnSiF}_6$                                                                                                                                  | $4\cdot\text{ZnSiF}_6$                                                                                                                                  |
|--------------------------------------|----------------------------------------------------------------------------------|----------------------------------------------------------------------------------|---------------------------------------------------------------------------------------------------------------------------------------------------------|---------------------------------------------------------------------------------------------------------------------------------------------------------|
| Chemical formula                     | $\text{C}_{36}\text{H}_{36}\text{F}_6\text{N}_4\text{O}_8\text{SiZn}$<br>SQUEEZE | $\text{C}_{36}\text{H}_{36}\text{F}_6\text{N}_4\text{O}_8\text{SiZn}$<br>SQUEEZE | $(\text{C}_{44}\text{H}_{30}\text{F}_6\text{N}_6\text{O}_{12}\text{SiZn})$ ,<br>$2(\text{C}_2\text{H}_6\text{O})$ , $(\text{C}_2\text{H}_4\text{Cl}_2)$ | $(\text{C}_{44}\text{H}_{30}\text{F}_6\text{N}_6\text{O}_{12}\text{SiZn})$ ,<br>$2(\text{C}_2\text{H}_6\text{O})$ , $(\text{C}_2\text{H}_4\text{Cl}_2)$ |
| Molecular weight                     | 860.15                                                                           | 860.15                                                                           | 1233.29                                                                                                                                                 | 1233.29                                                                                                                                                 |
| Crystal system                       | Monoclinic                                                                       | Monoclinic                                                                       | Monoclinic                                                                                                                                              | Monoclinic                                                                                                                                              |
| Space group                          | C2                                                                               | C2                                                                               | C2                                                                                                                                                      | C2                                                                                                                                                      |
| a(Å)                                 | 20.7481(11)                                                                      | 20.8352 (5)                                                                      | 23.2747(19)                                                                                                                                             | 23.2828(4)                                                                                                                                              |
| b(Å)                                 | 7.6446(4)                                                                        | 7.6558(3)                                                                        | 7.5775(5)                                                                                                                                               | 7.59880(10)                                                                                                                                             |
| c(Å)                                 | 14.9105(7)                                                                       | 14.9174(5)                                                                       | 16.5826(12)                                                                                                                                             | 16.6091(3)                                                                                                                                              |
| $\alpha$ (deg)                       | 90                                                                               | 90                                                                               | 90                                                                                                                                                      | 90                                                                                                                                                      |
| $\beta$ (deg)                        | 107.187(3)                                                                       | 107.298(2)                                                                       | 100.139(2)                                                                                                                                              | 100.1650(10)                                                                                                                                            |
| $\gamma$ (deg)                       | 90                                                                               | 90                                                                               | 90                                                                                                                                                      | 90                                                                                                                                                      |
| V(Å <sup>3</sup> )                   | 2259.4(2)                                                                        | 2271.85(15)                                                                      | 2878.9(4)                                                                                                                                               | 2892.38(8)                                                                                                                                              |
| Z                                    | 2                                                                                | 2                                                                                | 2                                                                                                                                                       | 2                                                                                                                                                       |
| Color                                | Colorless                                                                        | Colorless                                                                        | Colorless                                                                                                                                               | Colorless                                                                                                                                               |
| Crystal dim (mm)                     | 0.08 x 0.07 x 0.05                                                               | 0.08 x 0.06 x 0.05                                                               | 0.09 x 0.07 x 0.04                                                                                                                                      | 0.10 x 0.08 x 0.08                                                                                                                                      |
| Dcalc (gcm <sup>-3</sup> )           | 1.264                                                                            | 1.257                                                                            | 1.423                                                                                                                                                   | 1.416                                                                                                                                                   |
| F(000)                               | 884                                                                              | 884                                                                              | 1264                                                                                                                                                    | 1264                                                                                                                                                    |
| $\mu$ (mm <sup>-1</sup> )            | 0.642                                                                            | 0.639                                                                            | 0.626                                                                                                                                                   | 0.623                                                                                                                                                   |
| Number of data meas.                 | 8259                                                                             | 8033                                                                             | 14482                                                                                                                                                   | 15335                                                                                                                                                   |
| Number of data with $I > 2\sigma(I)$ | 4559                                                                             | 4057                                                                             | 5951                                                                                                                                                    | 6734                                                                                                                                                    |
| R(int)                               | 0.0458                                                                           | 0.023                                                                            | 0.035                                                                                                                                                   | 0.0205                                                                                                                                                  |
| R                                    | 0.1045                                                                           | 0.0792                                                                           | 0.0771                                                                                                                                                  | 0.0411                                                                                                                                                  |
| Rw                                   | 0.2564                                                                           | 0.2235                                                                           | 0.1466                                                                                                                                                  | 0.1140                                                                                                                                                  |
| R(all)                               | 0.1317                                                                           | 0.0838                                                                           | 0.0917                                                                                                                                                  | 0.0473                                                                                                                                                  |
| Flack parameter                      | 0.08(4)                                                                          | 0.05(2)                                                                          | 0.004(17)                                                                                                                                               | 0.032(9)                                                                                                                                                |
| GOF                                  | 1.122                                                                            | 1.062                                                                            | 1.254                                                                                                                                                   | 1.023                                                                                                                                                   |

- 2 G. M. Sheldrick, *Acta Cryst.*, 2008, **A64**, 112-122.
- 3 A. L. Spek, *PLATON*, The University of Utrecht, Utrecht, The Netherlands, 1999.
